# Supplementary material for: Arabidopsis retrotransposon virus-like particles and their regulation by epigenetically activated small RNA
Source: HighWire-hosted journal article supplement (doi:10.1101/gr.259044.119), 2020-04-01
Supplement: Supplemental_Table_S1.xlsx [file Supplemental_Table_S1.xlsx]

## Sheet: Note
Table S1 - Differential transposon content, read support, and structural variant analysis
Differential transposon content analysis in short-read VLP sequencing
Filtering criteria
Log2 fold change >= 2
FDR controlled at 0.05
Column information
te_id	Transposable element (TE) identification number
logFC	Fold change in log2 values
logCPM	log2 counts per million
pvalue	P values
te_family	TE family
te_superfamily	TE superfamily
Number of differentially regulated gene or TE
	TEs
	Up	Down
ddm1 vs WT	14	0
ddm1rdr6 vs WT	169	7
ddm1rdr6 vs ddm1	85	1
DE elements read support
Column information
te_id	Transposable element (TE) identification number
te_family	TE family
te_superfamily	TE superfamily
length	TE length
{sample}_fl	# of reciprocal ONT read overlaps at 95% length of read and element (mapQ > 0)
{sample}_prop_disc	Proportion of discordantly mapped Illumina read pairs across replicates
{sample}_conc	Sum of concordantly mapped Illumina reads (unique mappers) across replicates
{sample}_{ff,rr,rf}	Sum of discordantly mapped Illumina reads of each mate orientation across replicates
{sample}_ont	# of mapped ONT reads (mapQ > 0)
{sample}.{1,2,3}_{conc,ff,rr,rf}	# of mapped Illumina reads for each replicate
Structural variants detected by long read VLP sequencing
Variant calls with a minimum read support of 3 are listed
Column information
library	Long read ONT sequencing library in which the call was made
te_id	Transposable element (TE) identification number
te_family	TE family
te_superfamily	TE superfamily
sv_type	Type of structural variant: deletion (DEL), duplication (DUP), inversion (INV), or breakpoint (BND)
sv_length	Length of the structural variant
sv_read_support	Number of reads supporting the variant call

## Sheet: DDM1vWTup
te_id	logFC	logCPM	PValue	te_family	te_superfamily
AT1TE45315	7.4206	13.1578	4.59624e-10	ATGP3	LTR/Gypsy
AT3TE16035	4.26695	11.371	9.9502e-08	ATGP3	LTR/Gypsy
AT1TE47770	5.2855	8.17957	0.000124493	ATHILA0_I	LTR/Gypsy
AT1TE51010	6.62995	9.87335	9.25071e-07	ATHILA2	LTR/Gypsy
AT3TE57115	5.70624	8.62985	2.22988e-05	ATHILA2	LTR/Gypsy
AT5TE40195	2.77024	9.30144	0.000122843	ATHILA2	LTR/Gypsy
AT1TE36035	7.92136	14.1835	5.0841e-10	ATCOPIA51	LTR/Copia
AT3TE91200	4.16215	9.57578	1.35254e-08	ATCOPIA51	LTR/Copia
AT4TE25200	5.70023	12.765	7.91281e-09	ATCOPIA51	LTR/Copia
AT3TE76225	8.75666	17.3766	4.21538e-05	ATCOPIA52	LTR/Copia
AT2TE14490	2.8178	8.48728	5.89119e-06	ATCOPIA76	LTR/Copia
AT5TE20395	6.55861	16.4522	9.38482e-05	ATCOPIA93	LTR/Copia
AT2TE14150	2.85994	7.85009	8.75356e-05	ATLINEIII	LINE/L1
AT3TE55725	3.11934	7.93878	1.09853e-05	ATDNA12T3_2	DNA

## Sheet: DDM1RDR6vWTup
te_id	logFC	logCPM	PValue	te_family	te_superfamily
AT4TE52540	5.18636	7.18326	0.000559246	Unassigned	Unassigned
AT4TE23780	2.75452	7.45823	0.00244705	ATREP10D	RC/Helitron
AT1TE64630	3.44182	7.10005	0.00162818	ATREP11	RC/Helitron
AT1TE55450	3.42458	7.14381	0.00153091	ATREP15	RC/Helitron
AT3TE60430	5.29308	7.1294	0.000389072	ATGP10	LTR/Gypsy
AT1TE45315	8.98315	13.1578	3.50642e-14	ATGP3	LTR/Gypsy
AT3TE16035	5.3882	11.371	3.91724e-12	ATGP3	LTR/Gypsy
AT4TE17505	2.03421	8.29815	0.000189469	ATHILA	LTR/Gypsy
AT1TE47770	7.18256	8.17957	7.54142e-12	ATHILA0_I	LTR/Gypsy
AT2TE16525	2.96042	8.07866	1.32772e-06	ATHILA0_I	LTR/Gypsy
AT2TE17585	2.64227	8.49095	3.31586e-06	ATHILA0_I	LTR/Gypsy
AT2TE17620	2.21151	7.74972	0.000900507	ATHILA0_I	LTR/Gypsy
AT3TE60515	6.61416	7.69454	6.07755e-09	ATHILA0_I	LTR/Gypsy
AT4TE13375	2.33462	8.29936	3.99359e-05	ATHILA0_I	LTR/Gypsy
AT4TE14220	4.90362	7.90491	2.15036e-09	ATHILA0_I	LTR/Gypsy
AT4TE18635	6.70728	7.7634	1.82515e-09	ATHILA0_I	LTR/Gypsy
AT5TE40185	5.79935	8.7465	1.28798e-12	ATHILA0_I	LTR/Gypsy
AT5TE43820	3.12709	9.23772	1.22417e-07	ATHILA0_I	LTR/Gypsy
AT1TE44690	2.91168	10.1194	8.84418e-07	ATHILA2	LTR/Gypsy
AT1TE45200	2.59992	9.53554	5.02479e-06	ATHILA2	LTR/Gypsy
AT1TE46190	2.6113	8.35803	3.2541e-06	ATHILA2	LTR/Gypsy
AT1TE46755	2.54791	9.79677	6.62777e-06	ATHILA2	LTR/Gypsy
AT1TE47750	3.46433	9.64634	1.03243e-08	ATHILA2	LTR/Gypsy
AT1TE47760	4.56582	7.682	1.23211e-07	ATHILA2	LTR/Gypsy
AT1TE47765	2.08034	9.06904	0.000114777	ATHILA2	LTR/Gypsy
AT1TE47780	2.75328	8.39	7.24068e-06	ATHILA2	LTR/Gypsy
AT1TE49300	2.87261	10.2321	1.38721e-06	ATHILA2	LTR/Gypsy
AT1TE49325	3.37298	9.30948	1.27341e-08	ATHILA2	LTR/Gypsy
AT1TE50945	3.35294	9.28522	2.38337e-08	ATHILA2	LTR/Gypsy
AT1TE51000	2.4598	9.11168	9.61828e-06	ATHILA2	LTR/Gypsy
AT1TE51010	9.10647	9.87335	1.2516e-16	ATHILA2	LTR/Gypsy
AT1TE51080	2.0759	10.3073	0.000198902	ATHILA2	LTR/Gypsy
AT1TE51370	2.51519	8.58146	9.04357e-06	ATHILA2	LTR/Gypsy
AT1TE51645	2.52566	9.75591	9.68635e-06	ATHILA2	LTR/Gypsy
AT1TE51735	2.56541	10.3699	7.65787e-06	ATHILA2	LTR/Gypsy
AT1TE52000	3.14543	8.62292	2.89144e-07	ATHILA2	LTR/Gypsy
AT2TE11145	2.48006	10.1219	1.28178e-05	ATHILA2	LTR/Gypsy
AT2TE11330	2.76275	9.17073	1.36646e-06	ATHILA2	LTR/Gypsy
AT2TE11765	2.75917	8.86652	8.7633e-07	ATHILA2	LTR/Gypsy
AT2TE12285	3.54323	9.23507	5.37783e-09	ATHILA2	LTR/Gypsy
AT2TE12425	2.97182	9.87502	5.53606e-07	ATHILA2	LTR/Gypsy
AT2TE15500	2.36395	8.80018	1.41031e-05	ATHILA2	LTR/Gypsy
AT2TE15695	3.89554	9.05013	4.11482e-09	ATHILA2	LTR/Gypsy
AT2TE16190	2.25821	10.7041	9.10888e-05	ATHILA2	LTR/Gypsy
AT2TE16265	2.3598	9.02577	1.76286e-05	ATHILA2	LTR/Gypsy
AT2TE16465	3.72907	7.71688	1.1968e-06	ATHILA2	LTR/Gypsy
AT2TE17405	2.13191	9.40655	7.18993e-05	ATHILA2	LTR/Gypsy
AT2TE17425	2.30442	8.61752	2.539e-05	ATHILA2	LTR/Gypsy
AT2TE17570	3.29423	9.62951	4.58606e-08	ATHILA2	LTR/Gypsy
AT2TE17795	3.01695	8.44214	4.58518e-07	ATHILA2	LTR/Gypsy
AT2TE18015	2.10798	9.32843	0.000109053	ATHILA2	LTR/Gypsy
AT2TE18885	3.48489	9.26608	5.62106e-09	ATHILA2	LTR/Gypsy
AT2TE21280	2.53348	8.84693	4.91099e-06	ATHILA2	LTR/Gypsy
AT2TE21420	2.59994	8.92818	3.63868e-06	ATHILA2	LTR/Gypsy
AT2TE21450	2.39927	8.35233	1.39721e-05	ATHILA2	LTR/Gypsy
AT2TE22260	2.16976	8.15436	0.000129806	ATHILA2	LTR/Gypsy
AT2TE22505	3.46958	10.5287	1.93283e-08	ATHILA2	LTR/Gypsy
AT3TE48090	3.00787	8.41561	4.97402e-07	ATHILA2	LTR/Gypsy
AT3TE50270	5.7357	8.67478	1.77684e-12	ATHILA2	LTR/Gypsy
AT3TE50970	3.38994	9.46847	1.99085e-08	ATHILA2	LTR/Gypsy
AT3TE51255	2.68995	8.99356	1.94913e-06	ATHILA2	LTR/Gypsy
AT3TE51300	2.04018	8.62884	0.000145506	ATHILA2	LTR/Gypsy
AT3TE51650	2.50135	9.15635	5.88634e-06	ATHILA2	LTR/Gypsy
AT3TE55375	2.39333	9.7708	1.72122e-05	ATHILA2	LTR/Gypsy
AT3TE57110	2.25467	9.53454	4.90087e-05	ATHILA2	LTR/Gypsy
AT3TE57115	7.69301	8.62985	1.49742e-13	ATHILA2	LTR/Gypsy
AT3TE57340	3.40336	9.45659	3.3543e-08	ATHILA2	LTR/Gypsy
AT3TE58020	2.0552	9.29588	0.000170406	ATHILA2	LTR/Gypsy
AT3TE58040	3.76806	8.2087	2.04744e-08	ATHILA2	LTR/Gypsy
AT3TE59095	4.54383	8.30879	1.96749e-10	ATHILA2	LTR/Gypsy
AT3TE59385	2.41307	8.46388	1.48373e-05	ATHILA2	LTR/Gypsy
AT3TE59595	2.41202	7.54906	0.000778326	ATHILA2	LTR/Gypsy
AT3TE59695	2.61853	10.2744	5.21985e-06	ATHILA2	LTR/Gypsy
AT3TE59705	4.64065	8.38852	8.03881e-11	ATHILA2	LTR/Gypsy
AT3TE60455	2.99692	9.26291	1.89337e-07	ATHILA2	LTR/Gypsy
AT3TE60510	2.06061	8.4331	0.000342498	ATHILA2	LTR/Gypsy
AT3TE61615	2.65199	8.70881	4.44012e-06	ATHILA2	LTR/Gypsy
AT3TE62025	2.23564	9.36067	4.40903e-05	ATHILA2	LTR/Gypsy
AT4TE08850	2.84643	9.44376	4.84524e-07	ATHILA2	LTR/Gypsy
AT4TE13290	2.37099	9.07723	1.48704e-05	ATHILA2	LTR/Gypsy
AT4TE14295	2.79191	11.1205	4.97072e-06	ATHILA2	LTR/Gypsy
AT4TE14300	7.48768	8.31182	2.40492e-13	ATHILA2	LTR/Gypsy
AT4TE14410	2.88171	9.51933	6.28759e-07	ATHILA2	LTR/Gypsy
AT4TE15945	2.04676	9.98614	0.000193422	ATHILA2	LTR/Gypsy
AT4TE16150	2.23596	9.7961	5.25265e-05	ATHILA2	LTR/Gypsy
AT4TE16190	2.76764	9.17709	1.19725e-06	ATHILA2	LTR/Gypsy
AT4TE16400	2.00966	9.64957	0.000223346	ATHILA2	LTR/Gypsy
AT4TE17070	3.91018	9.90667	9.79992e-10	ATHILA2	LTR/Gypsy
AT4TE17520	2.34296	7.95422	0.000127655	ATHILA2	LTR/Gypsy
AT4TE18695	3.2651	9.49542	3.61634e-08	ATHILA2	LTR/Gypsy
AT4TE18755	2.90445	9.60571	6.94161e-07	ATHILA2	LTR/Gypsy
AT4TE20745	2.08627	10.3055	0.000184876	ATHILA2	LTR/Gypsy
AT4TE20920	2.39146	8.73182	1.2598e-05	ATHILA2	LTR/Gypsy
AT5TE40195	3.7607	9.30144	1.15022e-08	ATHILA2	LTR/Gypsy
AT5TE41325	4.06335	10.2774	3.94667e-10	ATHILA2	LTR/Gypsy
AT5TE41425	3.37125	8.83514	2.40717e-08	ATHILA2	LTR/Gypsy
AT5TE42065	2.35928	8.40072	2.1379e-05	ATHILA2	LTR/Gypsy
AT5TE42420	2.38703	10.5234	3.23581e-05	ATHILA2	LTR/Gypsy
AT5TE42825	2.97362	9.0474	2.33561e-07	ATHILA2	LTR/Gypsy
AT5TE43255	2.14851	10.0617	8.31042e-05	ATHILA2	LTR/Gypsy
AT5TE43400	2.96066	9.54455	3.19698e-07	ATHILA2	LTR/Gypsy
AT5TE44070	3.57419	10.2384	8.70278e-09	ATHILA2	LTR/Gypsy
AT5TE44205	2.67338	9.01389	2.50824e-06	ATHILA2	LTR/Gypsy
AT5TE46760	3.26593	8.62449	8.00004e-08	ATHILA2	LTR/Gypsy
AT5TE47200	2.10765	10.5288	0.000185519	ATHILA2	LTR/Gypsy
AT5TE47485	3.10429	8.91082	2.28272e-07	ATHILA2	LTR/Gypsy
AT5TE47500	2.05889	9.60713	0.000160632	ATHILA2	LTR/Gypsy
AT2TE12040	2.49339	8.30194	9.28692e-06	ATHILA3	LTR/Gypsy
AT2TE19495	3.02686	7.57503	4.25621e-05	ATHILA3	LTR/Gypsy
AT3TE58075	2.05482	8.05669	0.000322889	ATHILA3	LTR/Gypsy
AT4TE09795	2.27562	7.65946	0.00175146	ATHILA3	LTR/Gypsy
AT4TE16230	4.57252	8.30651	1.31104e-10	ATHILA3	LTR/Gypsy
AT5TE46015	2.83265	8.61505	9.47474e-07	ATHILA3	LTR/Gypsy
AT5TE46255	3.02257	8.55043	2.03503e-07	ATHILA3	LTR/Gypsy
AT4TE13305	4.50226	7.54807	3.31001e-07	ATHILA5	LTR/Gypsy
AT1TE45475	2.55989	8.67361	4.8238e-06	ATHILA6A	LTR/Gypsy
AT1TE51040	2.19762	10.2217	7.15072e-05	ATHILA6A	LTR/Gypsy
AT1TE51475	2.73792	8.86183	1.12873e-06	ATHILA6A	LTR/Gypsy
AT2TE15435	4.57569	8.35464	1.72207e-10	ATHILA6A	LTR/Gypsy
AT2TE16255	2.38185	8.19921	4.95054e-05	ATHILA6A	LTR/Gypsy
AT2TE17430	2.84296	8.568	1.66978e-06	ATHILA6A	LTR/Gypsy
AT2TE17640	2.37268	8.01895	4.24259e-05	ATHILA6A	LTR/Gypsy
AT2TE18895	3.68367	10.3585	2.33044e-09	ATHILA6A	LTR/Gypsy
AT2TE19055	2.57445	9.28029	7.63765e-06	ATHILA6A	LTR/Gypsy
AT2TE20440	4.13412	9.14677	4.66834e-10	ATHILA6A	LTR/Gypsy
AT2TE24385	2.00435	10.6427	0.000399683	ATHILA6A	LTR/Gypsy
AT3TE56710	2.8514	8.40815	8.18055e-07	ATHILA6A	LTR/Gypsy
AT3TE57470	2.40684	9.18125	1.1837e-05	ATHILA6A	LTR/Gypsy
AT3TE59610	2.29787	8.03728	0.000212999	ATHILA6A	LTR/Gypsy
AT4TE14035	2.18607	10.4901	0.000126862	ATHILA6A	LTR/Gypsy
AT4TE15785	3.58339	7.70312	4.93278e-06	ATHILA6A	LTR/Gypsy
AT4TE15800	2.14324	8.69017	6.8651e-05	ATHILA6A	LTR/Gypsy
AT4TE15805	2.34368	9.39571	2.09347e-05	ATHILA6A	LTR/Gypsy
AT4TE16395	3.03977	9.61282	3.3178e-07	ATHILA6A	LTR/Gypsy
AT4TE18060	2.19188	9.08955	8.65366e-05	ATHILA6A	LTR/Gypsy
AT4TE18920	3.26684	8.64825	8.96993e-08	ATHILA6A	LTR/Gypsy
AT4TE19040	2.70994	9.68043	1.83365e-06	ATHILA6A	LTR/Gypsy
AT5TE38625	2.96416	8.62534	2.33838e-07	ATHILA6A	LTR/Gypsy
AT5TE42435	2.27075	8.95199	2.91429e-05	ATHILA6A	LTR/Gypsy
AT5TE42440	2.16062	8.65282	0.000118466	ATHILA6A	LTR/Gypsy
AT5TE44225	3.0682	9.19608	1.09491e-07	ATHILA6A	LTR/Gypsy
AT5TE46485	5.33006	9.01962	1.51442e-12	ATHILA6A	LTR/Gypsy
AT1TE44670	2.0804	9.50911	0.000146917	ATHILA6B	LTR/Gypsy
AT1TE44680	3.53674	8.30743	2.90634e-08	ATHILA6B	LTR/Gypsy
AT1TE46775	3.61884	8.38067	1.43146e-08	ATHILA6B	LTR/Gypsy
AT1TE49320	2.70273	9.45031	3.06214e-06	ATHILA6B	LTR/Gypsy
AT1TE49845	3.96713	10.7794	1.70186e-09	ATHILA6B	LTR/Gypsy
AT1TE51005	2.11622	7.87699	0.000731172	ATHILA6B	LTR/Gypsy
AT3TE49545	3.40821	9.85636	1.17337e-08	ATHILA6B	LTR/Gypsy
AT3TE50175	8.10036	8.86209	5.34606e-15	ATHILA6B	LTR/Gypsy
AT3TE55360	2.11305	9.90705	0.000163257	ATHILA6B	LTR/Gypsy
AT4TE18700	2.50282	8.83742	9.77787e-06	ATHILA6B	LTR/Gypsy
AT5TE42985	3.64928	9.84768	2.79303e-09	ATHILA6B	LTR/Gypsy
AT1TE46690	2.33758	9.3789	2.2111e-05	ATHILA7	LTR/Gypsy
AT2TE26850	5.70872	7.18447	3.68084e-05	ATHILA7	LTR/Gypsy
AT3TE91870	2.79305	7.4235	0.00193726	ATCOPIA13	LTR/Copia
AT5TE65370	3.59358	10.3103	4.75334e-09	ATCOPIA21	LTR/Copia
AT1TE66380	2.73201	10.1689	4.19327e-06	ATCOPIA48	LTR/Copia
AT1TE36035	7.76596	14.1835	4.27867e-10	ATCOPIA51	LTR/Copia
AT3TE91200	4.10348	9.57578	8.12678e-09	ATCOPIA51	LTR/Copia
AT4TE25200	6.93234	12.765	1.73512e-12	ATCOPIA51	LTR/Copia
AT3TE76225	8.65334	17.3766	3.67427e-05	ATCOPIA52	LTR/Copia
AT1TE41580	2.95187	9.71686	1.79964e-06	ATCOPIA93	LTR/Copia
AT5TE20395	7.82321	16.4522	5.91536e-06	ATCOPIA93	LTR/Copia
AT1TE34650	2.43941	7.58271	0.00230639	ATLINEIII	LINE/L1
AT5TE72200	5.18538	7.12634	0.000649345	TSCL	LINE?
AT2TE28020	2.23501	9.12507	0.000119724	ATMU1	DNA/MuDR
AT4TE14155	5.27247	6.95545	0.00100311	ATDNA12T3_2	DNA
AT5TE40490	3.56192	7.47057	0.000525761	ATDNA12T3_2	DNA

## Sheet: DDM1RDR6vDDM1up
te_id	logFC	logCPM	PValue	te_family	te_superfamily
AT1TE44680	2.1144	8.30743	3.65146e-05	ATHILA6B	LTR/Gypsy
AT1TE45200	2.23943	9.53554	0.000124873	ATHILA2	LTR/Gypsy
AT1TE46190	2.40037	8.35803	8.7946e-06	ATHILA2	LTR/Gypsy
AT1TE46305	2.69209	8.12025	3.69533e-06	ATHILA0_I	LTR/Gypsy
AT1TE46385	2.11793	8.36697	0.000205573	ATHILA2	LTR/Gypsy
AT1TE46690	2.10139	9.3789	0.000206279	ATHILA7	LTR/Gypsy
AT1TE46775	2.38223	8.38067	7.14191e-06	ATHILA6B	LTR/Gypsy
AT1TE47750	2.33153	9.64634	6.21542e-05	ATHILA2	LTR/Gypsy
AT1TE47760	2.59375	7.682	2.50003e-05	ATHILA2	LTR/Gypsy
AT1TE49325	2.50629	9.30948	1.18829e-05	ATHILA2	LTR/Gypsy
AT1TE49845	2.71574	10.7794	4.07105e-05	ATHILA6B	LTR/Gypsy
AT1TE50945	2.34656	9.28522	4.095e-05	ATHILA2	LTR/Gypsy
AT1TE51010	2.47652	9.87335	3.39719e-05	ATHILA2	LTR/Gypsy
AT1TE51040	2.08604	10.2217	0.000612431	ATHILA6A	LTR/Gypsy
AT1TE51475	2.61433	8.86183	4.2542e-06	ATHILA6A	LTR/Gypsy
AT2TE11330	2.25479	9.17073	5.89476e-05	ATHILA2	LTR/Gypsy
AT2TE11765	2.79436	8.86652	1.11883e-06	ATHILA2	LTR/Gypsy
AT2TE12040	2.17663	8.30194	4.07027e-05	ATHILA3	LTR/Gypsy
AT2TE12285	2.60388	9.23507	6.58156e-06	ATHILA2	LTR/Gypsy
AT2TE12425	2.43984	9.87502	5.2864e-05	ATHILA2	LTR/Gypsy
AT2TE15435	2.7898	8.35464	4.80414e-07	ATHILA6A	LTR/Gypsy
AT2TE16465	2.79332	7.71688	1.23903e-05	ATHILA2	LTR/Gypsy
AT2TE16525	2.40355	8.07866	1.20036e-05	ATHILA0_I	LTR/Gypsy
AT2TE17425	2.38031	8.61752	1.47972e-05	ATHILA2	LTR/Gypsy
AT2TE17570	2.3197	9.62951	7.67786e-05	ATHILA2	LTR/Gypsy
AT2TE17585	2.26814	8.49095	2.11353e-05	ATHILA0_I	LTR/Gypsy
AT2TE17640	2.61777	8.01895	7.04298e-06	ATHILA6A	LTR/Gypsy
AT2TE17795	2.18411	8.44214	3.93248e-05	ATHILA2	LTR/Gypsy
AT2TE18885	2.48371	9.26608	1.32852e-05	ATHILA2	LTR/Gypsy
AT2TE18895	2.42767	10.3585	9.50149e-05	ATHILA6A	LTR/Gypsy
AT2TE19495	3.28073	7.57503	7.69648e-06	ATHILA3	LTR/Gypsy
AT2TE20440	2.3352	9.14677	3.91709e-05	ATHILA6A	LTR/Gypsy
AT2TE21280	2.17345	8.84693	6.94193e-05	ATHILA2	LTR/Gypsy
AT2TE21450	2.17457	8.35233	3.6146e-05	ATHILA2	LTR/Gypsy
AT2TE22260	2.05451	8.15436	0.000130242	ATHILA2	LTR/Gypsy
AT3TE49545	2.70597	9.85636	1.1929e-05	ATHILA6B	LTR/Gypsy
AT3TE50175	3.31957	8.86209	2.31554e-08	ATHILA6B	LTR/Gypsy
AT3TE50270	2.46719	8.67478	4.56814e-06	ATHILA2	LTR/Gypsy
AT3TE50970	2.70303	9.46847	5.0011e-06	ATHILA2	LTR/Gypsy
AT3TE51255	2.0744	8.99356	0.000176869	ATHILA2	LTR/Gypsy
AT3TE51650	2.01757	9.15635	0.000289373	ATHILA2	LTR/Gypsy
AT3TE55410	2.12598	8.42598	0.000102998	ATHILA2	LTR/Gypsy
AT3TE56710	2.24222	8.40815	2.1807e-05	ATHILA6A	LTR/Gypsy
AT3TE57470	2.10052	9.18125	0.000173304	ATHILA6A	LTR/Gypsy
AT3TE58040	2.42416	8.2087	6.54716e-06	ATHILA2	LTR/Gypsy
AT3TE58075	2.15853	8.05669	0.000123075	ATHILA3	LTR/Gypsy
AT3TE59095	2.82872	8.30879	2.53239e-07	ATHILA2	LTR/Gypsy
AT3TE59385	2.0947	8.46388	7.04552e-05	ATHILA2	LTR/Gypsy
AT3TE59595	2.42178	7.54906	0.000389526	ATHILA2	LTR/Gypsy
AT3TE59705	3.28613	8.38852	1.30998e-08	ATHILA2	LTR/Gypsy
AT3TE60200	2.03699	8.29613	0.000238722	ATHILA3	LTR/Gypsy
AT3TE60455	2.40697	9.26291	2.47234e-05	ATHILA2	LTR/Gypsy
AT3TE60515	2.31251	7.69454	0.000116705	ATHILA0_I	LTR/Gypsy
AT4TE08850	2.87169	9.44376	1.50668e-06	ATHILA2	LTR/Gypsy
AT4TE13290	2.0314	9.07723	0.000239291	ATHILA2	LTR/Gypsy
AT4TE13305	6.60002	7.54807	1.40317e-09	ATHILA5	LTR/Gypsy
AT4TE14220	3.15597	7.90491	2.27546e-07	ATHILA0_I	LTR/Gypsy
AT4TE14300	3.20302	8.31182	2.24582e-08	ATHILA2	LTR/Gypsy
AT4TE15800	2.32033	8.69017	2.17817e-05	ATHILA6A	LTR/Gypsy
AT4TE16190	2.58493	9.17709	9.6658e-06	ATHILA2	LTR/Gypsy
AT4TE16230	3.19108	8.30651	2.54216e-08	ATHILA3	LTR/Gypsy
AT4TE16395	2.09824	9.61282	0.000294875	ATHILA6A	LTR/Gypsy
AT4TE17070	2.30326	9.90667	0.000119832	ATHILA2	LTR/Gypsy
AT4TE18635	2.39029	7.7634	5.03686e-05	ATHILA0_I	LTR/Gypsy
AT4TE18695	2.06719	9.49542	0.000256011	ATHILA2	LTR/Gypsy
AT4TE20920	2.05232	8.73182	0.000127868	ATHILA2	LTR/Gypsy
AT5TE38625	3.64009	8.62534	4.61036e-09	ATHILA6A	LTR/Gypsy
AT5TE40185	2.71756	8.7465	8.25319e-07	ATHILA0_I	LTR/Gypsy
AT5TE41325	2.29328	10.2774	0.000189086	ATHILA2	LTR/Gypsy
AT5TE41425	2.16717	8.83514	5.08531e-05	ATHILA2	LTR/Gypsy
AT5TE41545	2.09582	8.65652	0.000101284	ATHILA4A	LTR/Gypsy
AT5TE42065	2.4652	8.40072	9.16622e-06	ATHILA2	LTR/Gypsy
AT5TE42435	2.33998	8.95199	2.8048e-05	ATHILA6A	LTR/Gypsy
AT5TE42825	2.51549	9.0474	9.25979e-06	ATHILA2	LTR/Gypsy
AT5TE42985	2.89052	9.84768	3.33398e-06	ATHILA6B	LTR/Gypsy
AT5TE43240	2.17785	8.59143	8.14506e-05	ATHILA2	LTR/Gypsy
AT5TE43400	2.1763	9.54455	0.000151071	ATHILA2	LTR/Gypsy
AT5TE43435	2.24997	8.15781	6.31757e-05	ATHILA6A	LTR/Gypsy
AT5TE44070	2.80059	10.2384	1.07232e-05	ATHILA2	LTR/Gypsy
AT5TE44225	2.27745	9.19608	4.32233e-05	ATHILA6A	LTR/Gypsy
AT5TE46015	2.34747	8.61505	1.91803e-05	ATHILA3	LTR/Gypsy
AT5TE46255	2.63798	8.55043	1.76896e-06	ATHILA3	LTR/Gypsy
AT5TE46485	3.2616	9.01962	6.96738e-08	ATHILA6A	LTR/Gypsy
AT5TE47485	2.14821	8.91082	7.92308e-05	ATHILA2	LTR/Gypsy
AT5TE65370	2.97111	10.3103	4.02109e-06	ATCOPIA21	LTR/Copia

## Sheet: DDM1vWTdown
te_id	logFC	logCPM	PValue	te_family	te_superfamily
NA	NA	NA	NA	NA	NA

## Sheet: DDM1RDR6vWTdown
te_id	logFC	logCPM	PValue	te_family	te_superfamily
AT1TE46660	-3.44459	7.18513	0.00131109	VANDAL3	DNA/MuDR
AT1TE54990	-2.45455	7.48536	0.00236628	ENDOVIR1	LTR/Copia
AT1TE62585	-2.5774	7.54025	0.00114461	ATGP1	LTR/Gypsy
AT2TE03965	-4.02021	9.06633	4.91317e-10	ATREP15	RC/Helitron
AT5TE08870	-3.63437	7.35464	0.000381985	ATCOPIA18	LTR/Copia
AT5TE43785	-2.58945	7.61523	0.000896373	ATCOPIA25	LTR/Copia
AT5TE44795	-3.2114	7.59726	0.000122072	ATENSPM6	DNA/En-Spm

## Sheet: DDM1RDR6vDDM1down
te_id	logFC	logCPM	PValue	te_family	te_superfamily
AT2TE03965	-2.47645	9.06633	0.000529939	ATREP15	RC/Helitron

## Sheet: DE Elements Read Support
te_id	te_family	te_superfamily	length	col0_fl	ddm1_fl	ddm1rdr6_fl	col0_prop_disc	ddm1_prop_disc	ddm1rdr6_prop_disc	col0_conc	col0_ff	col0_rr	col0_rf	ddm1_conc	ddm1_ff	ddm1_rr	ddm1_rf	ddm1rdr6_conc	ddm1rdr6_ff	ddm1rdr6_rr	ddm1rdr6_rf	col0_ont	ddm1_ont	ddm1rdr6_ont	col0.1_conc	col0.1_ff	col0.1_rr	col0.1_rf	col0.2_conc	col0.2_ff	col0.2_rr	col0.2_rf	col0.3_conc	col0.3_ff	col0.3_rr	col0.3_rf	ddm1.1_conc	ddm1.1_ff	ddm1.1_rr	ddm1.1_rf	ddm1.3_conc	ddm1.3_ff	ddm1.3_rr	ddm1.3_rf	ddm1rdr6.1_conc	ddm1rdr6.1_ff	ddm1rdr6.1_rr	ddm1rdr6.1_rf	ddm1rdr6.2_conc
AT3TE76225	ATCOPIA52	LTR/Copia	4938	0	18	0	0	0.0258488	0.0245601	47	0	0	0	24063	352	38	232	18811	294	40	128	2	3140	440	26	0	0	0	9	0	0	0	12	0	0	0	12127	160	26	110	11936	192	12	122	9688	160	22	60	4331
AT5TE20395	ATCOPIA93	LTR/Copia	5333	0	2	0	0	0.00190235	0.00211161	47	0	0	0	6308	0	2	10	13260	2	2	24	1	3093	2529	18	0	0	0	8	0	0	0	21	0	0	0	2848	0	0	4	3460	0	2	6	6729	0	2	12	2744
AT1TE36035	ATCOPIA51	LTR/Copia	4342	0	5	0	0	0.000801925	0	10	0	0	0	2494	0	0	2	2031	0	0	0	1	428	41	5	0	0	0	4	0	0	0	1	0	0	0	1044	0	0	2	1450	0	0	0	1003	0	0	0	462
AT1TE45315	ATGP3	LTR/Gypsy	5268	0	3	0	0	0	0.0042343	3	0	0	0	502	0	0	0	1417	0	0	6	0	86	36	2	0	0	0	1	0	0	0	0	0	0	0	172	0	0	0	330	0	0	0	699	0	0	2	307
AT4TE25200	ATCOPIA51	LTR/Copia	4973	0	0	0	0	0.00485437	0.0156709	9	0	0	0	412	0	0	2	1021	6	2	8	1	65	43	5	0	0	0	2	0	0	0	2	0	0	0	81	0	0	0	331	0	0	2	502	4	0	4	209
AT3TE16035	ATGP3	LTR/Gypsy	5277	0	0	0	0	0	0.0108696	10	0	0	0	182	0	0	0	368	2	0	2	0	36	11	6	0	0	0	3	0	0	0	1	0	0	0	63	0	0	0	119	0	0	0	200	0	0	2	77
AT4TE14295	ATHILA2	LTR/Gypsy	10869	0	0	0	0	0	0	57	0	0	0	140	0	0	0	411	0	0	0	3	12	1	41	0	0	0	13	0	0	0	3	0	0	0	116	0	0	0	24	0	0	0	13	0	0	0	254
AT4TE14035	ATHILA6A	LTR/Gypsy	11761	0	0	0	0	0	0	46	0	0	0	117	0	0	0	209	0	0	0	3	17	5	33	0	0	0	9	0	0	0	4	0	0	0	80	0	0	0	37	0	0	0	16	0	0	0	91
AT5TE42420	ATHILA2	LTR/Gypsy	11393	0	0	0	0	0	0	44	0	0	0	113	0	0	0	229	0	0	0	2	7	1	32	0	0	0	11	0	0	0	1	0	0	0	75	0	0	0	38	0	0	0	16	0	0	0	128
AT1TE66380	ATCOPIA48	LTR/Copia	4965	0	0	0	0	0	0	25	0	0	0	107	0	0	0	133	0	0	0	1	11	1	20	0	0	0	3	0	0	0	2	0	0	0	52	0	0	0	55	0	0	0	68	0	0	0	36
AT2TE16190	ATHILA2	LTR/Gypsy	9223	0	0	0	0	0	0	52	0	0	0	97	0	0	0	277	0	0	0	1	13	5	31	0	0	0	17	0	0	0	4	0	0	0	71	0	0	0	26	0	0	0	19	0	0	0	150
AT1TE51735	ATHILA2	LTR/Gypsy	11078	0	0	0	0	0	0	39	0	0	0	94	0	0	0	216	0	0	0	6	13	2	33	0	0	0	4	0	0	0	2	0	0	0	70	0	0	0	24	0	0	0	15	0	0	0	119
AT3TE91200	ATCOPIA51	LTR/Copia	4303	0	0	0	0	0.021978	0.025974	5	0	0	0	91	0	0	2	77	0	0	2	0	20	4	4	0	0	0	1	0	0	0	0	0	0	0	40	0	0	2	51	0	0	0	41	0	0	0	15
AT2TE22505	ATHILA2	LTR/Gypsy	7973	0	0	0	0	0	0	24	0	0	0	85	0	0	0	269	0	0	0	0	11	5	18	0	0	0	6	0	0	0	0	0	0	0	60	0	0	0	25	0	0	0	15	0	0	0	141
AT2TE24385	ATHILA6A	LTR/Gypsy	11567	0	0	0	0	0	0	59	0	0	0	84	0	0	0	265	0	0	0	2	10	2	37	0	0	0	15	0	0	0	7	0	0	0	67	0	0	0	17	0	0	0	17	0	0	0	147
AT5TE47200	ATHILA2	LTR/Gypsy	11297	0	0	0	0	0	0	53	0	0	0	82	0	0	0	239	0	0	0	1	10	1	35	0	0	0	14	0	0	0	4	0	0	0	61	0	0	0	21	0	0	0	22	0	0	0	126
AT4TE20745	ATHILA2	LTR/Gypsy	11403	0	0	0	0	0	0	46	0	0	0	82	0	0	0	179	0	0	0	4	14	3	35	0	0	0	9	0	0	0	2	0	0	0	39	0	0	0	43	0	0	0	16	0	0	0	57
AT1TE49300	ATHILA2	LTR/Gypsy	8539	0	0	0	0	0	0	24	0	0	0	80	0	0	0	197	0	0	0	1	11	3	14	0	0	0	7	0	0	0	3	0	0	0	59	0	0	0	21	0	0	0	21	0	0	0	101
AT1TE51080	ATHILA2	LTR/Gypsy	7335	0	0	0	0	0	0	45	0	0	0	69	0	0	0	202	0	0	0	6	14	1	30	0	0	0	11	0	0	0	4	0	0	0	45	0	0	0	24	0	0	0	12	0	0	0	105
AT3TE55360	ATHILA6B	LTR/Gypsy	9481	0	0	0	0	0	0	30	0	0	0	69	0	0	0	140	0	0	0	2	14	2	20	0	0	0	6	0	0	0	4	0	0	0	46	0	0	0	23	0	0	0	10	0	0	0	71
AT1TE41580	ATCOPIA93	LTR/Copia	5336	0	0	0	0	0.03125	0.0740741	13	0	0	0	64	0	0	2	108	0	0	8	1	128	85	6	0	0	0	2	0	0	0	5	0	0	0	29	0	0	0	35	0	0	2	34	0	0	4	27
AT3TE59695	ATHILA2	LTR/Gypsy	5091	0	0	0	0	0	0	34	0	0	0	62	0	0	0	215	0	0	0	5	6	2	25	0	0	0	6	0	0	0	3	0	0	0	45	0	0	0	17	0	0	0	16	0	0	0	119
AT2TE11145	ATHILA2	LTR/Gypsy	6436	0	0	0	0	0	0	32	0	0	0	61	0	0	0	186	0	0	0	1	10	4	23	0	0	0	6	0	0	0	3	0	0	0	44	0	0	0	17	0	0	0	14	0	0	0	102
AT1TE44690	ATHILA2	LTR/Gypsy	3868	0	0	0	0	0	0	23	0	0	0	60	0	0	0	193	0	0	0	0	7	0	15	0	0	0	4	0	0	0	4	0	0	0	46	0	0	0	14	0	0	0	15	0	0	0	103
AT1TE49845	ATHILA6B	LTR/Gypsy	8056	0	0	0	0	0	0	19	0	0	0	58	0	0	0	358	0	0	0	2	10	0	11	0	0	0	4	0	0	0	4	0	0	0	40	0	0	0	18	0	0	0	16	0	0	0	198
AT2TE14490	ATCOPIA76	LTR/Copia	301	0	0	0	0	0	0	6	0	0	0	58	0	0	0	24	0	0	0	1	14	1	4	0	0	0	0	0	0	0	2	0	0	0	48	0	0	0	10	0	0	0	14	0	0	0	6
AT3TE55375	ATHILA2	LTR/Gypsy	6235	0	0	0	0	0	0.0143885	27	0	0	0	57	0	0	0	139	0	0	2	4	11	0	21	0	0	0	5	0	0	0	1	0	0	0	50	0	0	0	7	0	0	0	13	0	0	0	72
AT2TE28020	ATMU1	DNA/MuDR	3350	0	0	0	0	0	0	13	0	0	0	57	0	0	0	63	0	0	0	1	11	5	9	0	0	0	4	0	0	0	0	0	0	0	30	0	0	0	27	0	0	0	8	0	0	0	31
AT2TE18895	ATHILA6A	LTR/Gypsy	4421	0	0	0	0	0	0	21	0	0	0	55	0	0	0	257	0	0	0	1	5	1	19	0	0	0	2	0	0	0	0	0	0	0	43	0	0	0	12	0	0	0	15	0	0	0	144
AT4TE16400	ATHILA2	LTR/Gypsy	6336	0	0	0	0	0	0	29	0	0	0	55	0	0	0	120	0	0	0	1	6	0	22	0	0	0	4	0	0	0	3	0	0	0	44	0	0	0	11	0	0	0	9	0	0	0	70
AT4TE15945	ATHILA2	LTR/Gypsy	9893	0	0	0	0	0	0	37	0	0	0	54	0	0	0	160	0	0	0	0	11	2	24	0	0	0	11	0	0	0	2	0	0	0	42	0	0	0	12	0	0	0	15	0	0	0	82
AT5TE41325	ATHILA2	LTR/Gypsy	3527	0	0	0	0	0	0	13	0	0	0	53	0	0	0	243	0	0	0	0	5	0	9	0	0	0	3	0	0	0	1	0	0	0	37	0	0	0	16	0	0	0	4	0	0	0	129
AT3TE57110	ATHILA2	LTR/Gypsy	3611	0	0	0	0	0	0	22	0	0	0	52	0	0	0	109	0	0	0	0	4	0	16	0	0	0	5	0	0	0	1	0	0	0	34	0	0	0	18	0	0	0	6	0	0	0	59
AT1TE51040	ATHILA6A	LTR/Gypsy	31019	0	0	0	0	0	0	45	0	0	0	51	0	0	0	197	0	0	0	2	22	6	34	0	0	0	9	0	0	0	2	0	0	0	34	0	0	0	17	0	0	0	22	0	0	0	99
AT5TE43255	ATHILA2	LTR/Gypsy	9083	0	0	0	0	0	0	44	0	0	0	51	0	0	0	170	0	0	0	1	9	6	39	0	0	0	3	0	0	0	2	0	0	0	31	0	0	0	20	0	0	0	17	0	0	0	81
AT5TE40195	ATHILA2	LTR/Gypsy	2477	0	0	0	0	0	0	6	0	0	0	51	0	0	0	101	0	0	0	1	5	0	3	0	0	0	3	0	0	0	0	0	0	0	33	0	0	0	18	0	0	0	2	0	0	0	80
AT4TE16150	ATHILA2	LTR/Gypsy	5419	0	0	0	0	0	0	29	0	0	0	50	0	0	0	141	0	0	0	3	9	0	20	0	0	0	8	0	0	0	1	0	0	0	37	0	0	0	13	0	0	0	15	0	0	0	81
AT5TE47500	ATHILA2	LTR/Gypsy	5793	0	0	0	0	0	0	27	0	0	0	49	0	0	0	117	0	0	0	0	6	3	20	0	0	0	5	0	0	0	2	0	0	0	32	0	0	0	17	0	0	0	6	0	0	0	68
AT4TE18755	ATHILA2	LTR/Gypsy	6807	0	0	0	0	0	0	16	0	0	0	48	0	0	0	131	0	0	0	1	8	0	12	0	0	0	2	0	0	0	2	0	0	0	36	0	0	0	12	0	0	0	4	0	0	0	80
AT1TE51645	ATHILA2	LTR/Gypsy	7384	0	0	0	0	0	0	22	0	0	0	47	0	0	0	140	0	0	0	2	5	0	14	0	0	0	5	0	0	0	3	0	0	0	32	0	0	0	15	0	0	0	10	0	0	0	73
AT1TE46755	ATHILA2	LTR/Gypsy	5934	0	0	0	0	0	0	24	0	0	0	46	0	0	0	152	0	0	0	5	5	2	16	0	0	0	7	0	0	0	1	0	0	0	37	0	0	0	9	0	0	0	8	0	0	0	89
AT1TE44670	ATHILA6B	LTR/Gypsy	4387	0	0	0	0	0	0	24	0	0	0	45	0	0	0	104	0	0	0	2	4	0	16	0	0	0	6	0	0	0	2	0	0	0	30	0	0	0	15	0	0	0	15	0	0	0	48
AT2TE18015	ATHILA2	LTR/Gypsy	4400	0	0	0	0	0	0	21	0	0	0	43	0	0	0	93	0	0	0	2	2	1	15	0	0	0	5	0	0	0	1	0	0	0	33	0	0	0	10	0	0	0	9	0	0	0	49
AT4TE19040	ATHILA6A	LTR/Gypsy	5098	0	0	0	0	0	0	21	0	0	0	42	0	0	0	139	0	0	0	0	3	3	17	0	0	0	3	0	0	0	1	0	0	0	29	0	0	0	13	0	0	0	6	0	0	0	76
AT4TE14410	ATHILA2	LTR/Gypsy	3810	0	0	0	0	0	0	16	0	0	0	42	0	0	0	121	0	0	0	4	7	4	13	0	0	0	2	0	0	0	1	0	0	0	29	0	0	0	13	0	0	0	6	0	0	0	64
AT1TE51010	ATHILA2	LTR/Gypsy	195	0	0	0	NA	0	0	0	0	0	0	41	0	0	0	190	0	0	0	0	0	1	0	0	0	0	0	0	0	0	0	0	0	0	35	0	0	0	6	0	0	0	6	0	0	0	101
AT3TE62025	ATHILA2	LTR/Gypsy	5885	0	0	0	0	0	0	21	0	0	0	41	0	0	0	98	0	0	0	0	7	0	17	0	0	0	2	0	0	0	2	0	0	0	31	0	0	0	10	0	0	0	8	0	0	0	47
AT3TE58020	ATHILA2	LTR/Gypsy	6078	0	0	0	0	0	0	20	0	0	0	41	0	0	0	91	0	0	0	2	10	2	13	0	0	0	5	0	0	0	2	0	0	0	29	0	0	0	12	0	0	0	5	0	0	0	52
AT4TE17070	ATHILA2	LTR/Gypsy	3759	0	0	0	0	0	0	11	0	0	0	40	0	0	0	184	0	0	0	0	4	3	8	0	0	0	2	0	0	0	1	0	0	0	28	0	0	0	12	0	0	0	7	0	0	0	106
AT5TE65370	ATCOPIA21	LTR/Copia	4743	0	0	0	0	0	0.0208333	22	0	0	0	39	0	0	0	192	4	0	0	0	10	1	18	0	0	0	2	0	0	0	2	0	0	0	30	0	0	0	9	0	0	0	136	2	0	0	23
AT1TE49320	ATHILA6B	LTR/Gypsy	4346	0	0	0	0	0	0	15	0	0	0	39	0	0	0	116	0	0	0	0	9	1	8	0	0	0	4	0	0	0	3	0	0	0	33	0	0	0	6	0	0	0	3	0	0	0	63
AT5TE43820	ATHILA0_I	LTR/Gypsy	4447	0	0	0	0	0	0	11	0	0	0	38	0	0	0	99	0	0	0	0	8	5	10	0	0	0	0	0	0	0	1	0	0	0	31	0	0	0	7	0	0	0	3	0	0	0	51
AT3TE55725	ATDNA12T3_2	DNA	64	0	0	0	0	0	0	3	0	0	0	38	0	0	0	16	0	0	0	0	0	0	1	0	0	0	2	0	0	0	0	0	0	0	36	0	0	0	2	0	0	0	6	0	0	0	9
AT1TE47765	ATHILA2	LTR/Gypsy	3343	0	0	0	0	0	0	18	0	0	0	37	0	0	0	76	0	0	0	0	2	0	14	0	0	0	4	0	0	0	0	0	0	0	31	0	0	0	6	0	0	0	7	0	0	0	39
AT5TE44070	ATHILA2	LTR/Gypsy	3642	0	0	0	0	0	0	17	0	0	0	36	0	0	0	240	0	0	0	0	4	2	9	0	0	0	7	0	0	0	1	0	0	0	24	0	0	0	12	0	0	0	6	0	0	0	131
AT2TE12425	ATHILA2	LTR/Gypsy	3929	0	0	0	0	0	0	18	0	0	0	36	0	0	0	173	0	0	0	1	2	4	9	0	0	0	6	0	0	0	3	0	0	0	28	0	0	0	8	0	0	0	8	0	0	0	102
AT1TE47750	ATHILA2	LTR/Gypsy	4997	0	0	0	0	0	0	13	0	0	0	35	0	0	0	146	0	0	0	1	8	1	11	0	0	0	1	0	0	0	1	0	0	0	29	0	0	0	6	0	0	0	15	0	0	0	80
AT4TE18695	ATHILA2	LTR/Gypsy	2814	0	0	0	0	0	0	13	0	0	0	35	0	0	0	127	0	0	0	0	7	0	11	0	0	0	2	0	0	0	0	0	0	0	27	0	0	0	8	0	0	0	8	0	0	0	67
AT4TE18060	ATHILA6A	LTR/Gypsy	4597	0	0	0	0	0	0	15	0	0	0	35	0	0	0	78	0	0	0	0	7	1	9	0	0	0	3	0	0	0	3	0	0	0	23	0	0	0	12	0	0	0	7	0	0	0	51
AT4TE15805	ATHILA6A	LTR/Gypsy	3813	0	0	0	0	0	0	20	0	0	0	34	0	0	0	108	0	0	0	1	3	1	13	0	0	0	6	0	0	0	1	0	0	0	29	0	0	0	5	0	0	0	12	0	0	0	60
AT4TE16395	ATHILA6A	LTR/Gypsy	4145	0	0	0	0	0	0	14	0	0	0	33	0	0	0	136	0	0	0	1	6	2	7	0	0	0	5	0	0	0	2	0	0	0	20	0	0	0	13	0	0	0	7	0	0	0	71
AT5TE43400	ATHILA2	LTR/Gypsy	3558	0	0	0	0	0	0	16	0	0	0	33	0	0	0	130	0	0	0	0	4	1	12	0	0	0	3	0	0	0	1	0	0	0	25	0	0	0	8	0	0	0	8	0	0	0	66
AT3TE57340	ATHILA2	LTR/Gypsy	2721	0	0	0	0	0	0	10	0	0	0	33	0	0	0	121	0	0	0	0	3	4	6	0	0	0	2	0	0	0	2	0	0	0	20	0	0	0	13	0	0	0	8	0	0	0	65
AT2TE17405	ATHILA2	LTR/Gypsy	4187	0	0	0	0	0	0	24	0	0	0	33	0	0	0	109	0	0	0	1	3	0	18	0	0	0	6	0	0	0	0	0	0	0	23	0	0	0	10	0	0	0	4	0	0	0	68
AT1TE51000	ATHILA2	LTR/Gypsy	3730	0	0	0	0	0	0	15	0	0	0	33	0	0	0	85	0	0	0	1	4	0	12	0	0	0	2	0	0	0	1	0	0	0	26	0	0	0	7	0	0	0	4	0	0	0	44
AT2TE15695	ATHILA2	LTR/Gypsy	1365	0	0	0	0	0	0	5	0	0	0	32	0	0	0	85	0	0	0	0	0	0	3	0	0	0	0	0	0	0	2	0	0	0	23	0	0	0	9	0	0	0	5	0	0	0	37
AT2TE17570	ATHILA2	LTR/Gypsy	2010	0	0	0	0	0	0	13	0	0	0	31	0	0	0	144	0	0	0	0	1	1	8	0	0	0	4	0	0	0	1	0	0	0	21	0	0	0	10	0	0	0	4	0	0	0	74
AT2TE14150	ATLINEIII	LINE/L1	139	0	0	0	0	0	0	3	0	0	0	31	0	0	0	16	0	0	0	0	0	0	1	0	0	0	0	0	0	0	2	0	0	0	28	0	0	0	3	0	0	0	4	0	0	0	4
AT2TE03965	ATREP15	RC/Helitron	1059	0	0	0	0.0204082	0	0	49	0	0	1	31	0	0	0	6	0	0	0	0	0	0	0	0	0	0	0	0	0	0	49	0	0	1	5	0	0	0	26	0	0	0	1	0	0	0	5
AT5TE42440	ATHILA6A	LTR/Gypsy	11329	0	0	0	0	0	0	11	0	0	0	30	0	0	0	51	0	0	0	1	20	5	7	0	0	0	3	0	0	0	1	0	0	0	25	0	0	0	5	0	0	0	9	0	0	0	22
AT1TE46690	ATHILA7	LTR/Gypsy	12240	0	0	0	0	0	0	20	0	0	0	29	0	0	0	108	0	0	0	0	7	0	14	0	0	0	3	0	0	0	3	0	0	0	22	0	0	0	7	0	0	0	10	0	0	0	59
AT2TE19055	ATHILA6A	LTR/Gypsy	5211	0	0	0	0	0	0	14	0	0	0	29	0	0	0	97	0	0	0	1	7	1	7	0	0	0	3	0	0	0	4	0	0	0	17	0	0	0	12	0	0	0	9	0	0	0	46
AT3TE49545	ATHILA6B	LTR/Gypsy	1884	0	0	0	0	0	0	17	0	0	0	28	0	0	0	179	0	0	0	1	3	0	15	0	0	0	2	0	0	0	0	0	0	0	17	0	0	0	11	0	0	0	10	0	0	0	104
AT1TE45200	ATHILA2	LTR/Gypsy	3582	0	0	0	0	0	0	18	0	0	0	28	0	0	0	124	0	0	0	1	3	2	10	0	0	0	5	0	0	0	3	0	0	0	17	0	0	0	11	0	0	0	11	0	0	0	61
AT3TE60510	ATHILA2	LTR/Gypsy	3405	0	0	0	0	0	0	9	0	0	0	28	0	0	0	40	0	0	0	1	2	1	5	0	0	0	4	0	0	0	0	0	0	0	20	0	0	0	8	0	0	0	4	0	0	0	19
AT5TE42985	ATHILA6B	LTR/Gypsy	1954	0	0	0	0	0	0	14	0	0	0	27	0	0	0	181	0	0	0	0	1	1	12	0	0	0	1	0	0	0	1	0	0	0	20	0	0	0	7	0	0	0	6	0	0	0	95
AT5TE44205	ATHILA2	LTR/Gypsy	3650	0	0	0	0	0	0	12	0	0	0	26	0	0	0	81	0	0	0	1	1	0	8	0	0	0	4	0	0	0	0	0	0	0	19	0	0	0	7	0	0	0	10	0	0	0	44
AT2TE21420	ATHILA2	LTR/Gypsy	3348	0	0	0	0	0	0	12	0	0	0	26	0	0	0	76	0	0	0	0	3	1	10	0	0	0	2	0	0	0	0	0	0	0	17	0	0	0	9	0	0	0	2	0	0	0	44
AT5TE44225	ATHILA6A	LTR/Gypsy	3288	0	0	0	0	0	0	12	0	0	0	25	0	0	0	103	0	0	0	1	7	1	11	0	0	0	0	0	0	0	1	0	0	0	21	0	0	0	4	0	0	0	3	0	0	0	54
AT4TE18700	ATHILA6B	LTR/Gypsy	3704	0	0	0	0	0	0	11	0	0	0	25	0	0	0	68	0	0	0	1	4	2	7	0	0	0	3	0	0	0	1	0	0	0	17	0	0	0	8	0	0	0	4	0	0	0	36
AT1TE47780	ATHILA2	LTR/Gypsy	3007	0	0	0	0	0.08	0	6	0	0	0	25	0	0	2	42	0	0	0	3	3	1	5	0	0	0	1	0	0	0	0	0	0	0	16	0	0	2	9	0	0	0	7	0	0	0	19
AT1TE49325	ATHILA2	LTR/Gypsy	1912	0	0	0	0	0	0	11	0	0	0	24	0	0	0	116	0	0	0	0	4	0	10	0	0	0	1	0	0	0	0	0	0	0	20	0	0	0	4	0	0	0	7	0	0	0	63
AT3TE57470	ATHILA6A	LTR/Gypsy	2359	0	0	0	0	0	0	17	0	0	0	24	0	0	0	93	0	0	0	1	4	2	13	0	0	0	2	0	0	0	2	0	0	0	16	0	0	0	8	0	0	0	9	0	0	0	49
AT3TE51650	ATHILA2	LTR/Gypsy	3199	0	0	0	0	0	0	16	0	0	0	24	0	0	0	91	0	0	0	1	2	4	13	0	0	0	2	0	0	0	1	0	0	0	14	0	0	0	10	0	0	0	6	0	0	0	42
AT2TE16265	ATHILA2	LTR/Gypsy	2430	0	0	0	0	0	0	15	0	0	0	24	0	0	0	80	0	0	0	0	3	0	11	0	0	0	3	0	0	0	1	0	0	0	15	0	0	0	9	0	0	0	5	0	0	0	38
AT3TE50970	ATHILA2	LTR/Gypsy	1784	0	0	0	0	0	0	11	0	0	0	23	0	0	0	133	0	0	0	0	3	0	6	0	0	0	5	0	0	0	0	0	0	0	18	0	0	0	5	0	0	0	5	0	0	0	75
AT2TE18885	ATHILA2	LTR/Gypsy	3590	0	0	0	0	0	0	10	0	0	0	23	0	0	0	114	0	0	0	1	2	4	10	0	0	0	0	0	0	0	0	0	0	0	18	0	0	0	5	0	0	0	4	0	0	0	65
AT1TE50945	ATHILA2	LTR/Gypsy	1305	0	0	0	0	0	0	10	0	0	0	23	0	0	0	111	0	0	0	2	0	0	7	0	0	0	3	0	0	0	0	0	0	0	14	0	0	0	9	0	0	0	6	0	0	0	59
AT3TE60455	ATHILA2	LTR/Gypsy	1464	0	0	0	0	0	0	13	0	0	0	23	0	0	0	106	0	0	0	0	4	0	10	0	0	0	3	0	0	0	0	0	0	0	17	0	0	0	6	0	0	0	8	0	0	0	48
AT2TE11330	ATHILA2	LTR/Gypsy	4191	0	0	0	0	0	0	13	0	0	0	23	0	0	0	96	0	0	0	1	3	0	9	0	0	0	1	0	0	0	3	0	0	0	17	0	0	0	6	0	0	0	10	0	0	0	52
AT4TE13290	ATHILA2	LTR/Gypsy	3831	0	0	0	0	0	0	16	0	0	0	23	0	0	0	84	0	0	0	0	1	0	12	0	0	0	3	0	0	0	1	0	0	0	15	0	0	0	8	0	0	0	12	0	0	0	44
AT3TE51300	ATHILA2	LTR/Gypsy	2338	0	0	0	0	0	0	13	0	0	0	23	0	0	0	55	0	0	0	1	5	0	11	0	0	0	1	0	0	0	1	0	0	0	17	0	0	0	6	0	0	0	3	0	0	0	32
AT3TE61615	ATHILA2	LTR/Gypsy	2076	0	0	0	0	0	0	9	0	0	0	22	0	0	0	62	0	0	0	0	4	3	6	0	0	0	1	0	0	0	2	0	0	0	14	0	0	0	8	0	0	0	3	0	0	0	32
AT4TE08850	ATHILA2	LTR/Gypsy	1779	0	0	0	0	0	0	17	0	0	0	21	0	0	0	127	0	0	0	0	1	0	13	0	0	0	3	0	0	0	1	0	0	0	19	0	0	0	2	0	0	0	7	0	0	0	66
AT5TE46760	ATHILA2	LTR/Gypsy	1713	0	0	0	0	0	0	6	0	0	0	21	0	0	0	63	0	0	0	0	3	0	5	0	0	0	1	0	0	0	0	0	0	0	17	0	0	0	4	0	0	0	2	0	0	0	36
AT1TE52000	ATHILA2	LTR/Gypsy	1770	0	0	0	0	0	0	6	0	0	0	21	0	0	0	60	0	0	0	0	2	0	4	0	0	0	1	0	0	0	1	0	0	0	11	0	0	0	10	0	0	0	3	0	0	0	39
AT2TE17430	ATHILA6A	LTR/Gypsy	1615	0	0	0	0	0	0	7	0	0	0	21	0	0	0	55	0	0	0	2	0	1	5	0	0	0	1	0	0	0	1	0	0	0	11	0	0	0	10	0	0	0	3	0	0	0	32
AT2TE12285	ATHILA2	LTR/Gypsy	1607	0	0	0	0	0	0	9	0	0	0	20	0	0	0	110	0	0	0	0	1	0	8	0	0	0	0	0	0	0	1	0	0	0	14	0	0	0	6	0	0	0	6	0	0	0	56
AT2TE20440	ATHILA6A	LTR/Gypsy	1674	0	0	0	0	0	0	5	0	0	0	20	0	0	0	100	0	0	0	0	1	0	3	0	0	0	1	0	0	0	1	0	0	0	9	0	0	0	11	0	0	0	3	0	0	0	40
AT3TE51255	ATHILA2	LTR/Gypsy	1293	0	0	0	0	0	0	12	0	0	0	20	0	0	0	84	0	0	0	1	0	0	9	0	0	0	2	0	0	0	1	0	0	0	10	0	0	0	10	0	0	0	3	0	0	0	51
AT5TE47485	ATHILA2	LTR/Gypsy	1393	0	0	0	0	0	0	8	0	0	0	20	0	0	0	80	0	0	0	1	0	0	4	0	0	0	2	0	0	0	2	0	0	0	14	0	0	0	6	0	0	0	5	0	0	0	46
AT5TE41425	ATHILA2	LTR/Gypsy	1751	0	0	0	0	0	0	7	0	0	0	20	0	0	0	78	0	0	0	0	1	0	6	0	0	0	1	0	0	0	0	0	0	0	16	0	0	0	4	0	0	0	5	0	0	0	46
AT3TE57115	ATHILA2	LTR/Gypsy	83	0	0	0	NA	0	0	0	0	0	0	20	0	0	0	70	0	0	0	0	0	0	0	0	0	0	0	0	0	0	0	0	0	0	16	0	0	0	4	0	0	0	0	0	0	0	44
AT2TE15500	ATHILA2	LTR/Gypsy	1822	0	0	0	0	0	0	13	0	0	0	19	0	0	0	69	0	0	0	1	3	0	11	0	0	0	2	0	0	0	0	0	0	0	10	0	0	0	9	0	0	0	1	0	0	0	38
AT2TE16255	ATHILA6A	LTR/Gypsy	3682	0	0	0	0	0	0	7	0	0	0	19	0	0	0	38	0	0	0	2	9	3	6	0	0	0	1	0	0	0	0	0	0	0	16	0	0	0	3	0	0	0	5	0	0	0	21
AT3TE59610	ATHILA6A	LTR/Gypsy	687	0	0	0	0	0	0	6	0	0	0	19	0	0	0	31	0	0	0	1	1	1	6	0	0	0	0	0	0	0	0	0	0	0	13	0	0	0	6	0	0	0	2	0	0	0	20
AT5TE42825	ATHILA2	LTR/Gypsy	2169	0	0	0	0	0	0	11	0	0	0	18	0	0	0	91	0	0	0	1	4	0	8	0	0	0	3	0	0	0	0	0	0	0	13	0	0	0	5	0	0	0	10	0	0	0	50
AT5TE42435	ATHILA6A	LTR/Gypsy	1795	0	0	0	0	0	0	15	0	0	0	18	0	0	0	78	0	0	0	0	2	1	9	0	0	0	5	0	0	0	1	0	0	0	14	0	0	0	4	0	0	0	8	0	0	0	39
AT2TE21280	ATHILA2	LTR/Gypsy	1712	0	0	0	0	0	0	12	0	0	0	18	0	0	0	74	0	0	0	0	2	0	9	0	0	0	2	0	0	0	1	0	0	0	12	0	0	0	6	0	0	0	5	0	0	0	43
AT4TE20920	ATHILA2	LTR/Gypsy	1750	0	0	0	0	0	0	12	0	0	0	18	0	0	0	65	0	0	0	0	2	1	9	0	0	0	3	0	0	0	0	0	0	0	13	0	0	0	5	0	0	0	7	0	0	0	34
AT1TE45475	ATHILA6A	LTR/Gypsy	1791	0	0	0	0	0	0	10	0	0	0	18	0	0	0	64	0	0	0	0	4	3	7	0	0	0	3	0	0	0	0	0	0	0	13	0	0	0	5	0	0	0	2	0	0	0	38
AT1TE51370	ATHILA2	LTR/Gypsy	1810	0	0	0	0	0	0	9	0	0	0	18	0	0	0	56	0	0	0	0	2	0	5	0	0	0	4	0	0	0	0	0	0	0	11	0	0	0	7	0	0	0	3	0	0	0	27
AT4TE16190	ATHILA2	LTR/Gypsy	1784	0	0	0	0	0	0	13	0	0	0	17	0	0	0	102	0	0	0	0	4	1	8	0	0	0	3	0	0	0	2	0	0	0	9	0	0	0	8	0	0	0	4	0	0	0	65
AT4TE18920	ATHILA6A	LTR/Gypsy	851	0	0	0	0	0	0	6	0	0	0	17	0	0	0	64	0	0	0	0	1	0	4	0	0	0	2	0	0	0	0	0	0	0	8	0	0	0	9	0	0	0	3	0	0	0	35
AT3TE48090	ATHILA2	LTR/Gypsy	1771	0	0	0	0	0	0	6	0	0	0	17	0	0	0	52	0	0	0	0	4	1	5	0	0	0	1	0	0	0	0	0	0	0	13	0	0	0	4	0	0	0	4	0	0	0	31
AT5TE41545	ATHILA4A	LTR/Gypsy	2686	0	0	0	0	0	0	16	0	0	0	16	0	0	0	58	0	0	0	0	3	0	11	0	0	0	5	0	0	0	0	0	0	0	13	0	0	0	3	0	0	0	7	0	0	0	32
AT5TE43785	ATCOPIA25	LTR/Copia	1585	0	0	0	0	0	0	20	0	0	0	16	0	0	0	3	0	0	0	2	2	1	15	0	0	0	4	0	0	0	1	0	0	0	11	0	0	0	5	0	0	0	1	0	0	0	2
AT3TE50270	ATHILA2	LTR/Gypsy	548	0	0	0	0	0	0	1	0	0	0	15	0	0	0	74	0	0	0	1	1	0	1	0	0	0	0	0	0	0	0	0	0	0	11	0	0	0	4	0	0	0	2	0	0	0	39
AT4TE15800	ATHILA6A	LTR/Gypsy	2278	0	0	0	0	0	0	13	0	0	0	15	0	0	0	62	0	0	0	0	3	0	7	0	0	0	5	0	0	0	1	0	0	0	13	0	0	0	2	0	0	0	6	0	0	0	27
AT1TE47770	ATHILA0_I	LTR/Gypsy	116	0	0	0	NA	0	0	0	0	0	0	15	0	0	0	46	0	0	0	0	0	1	0	0	0	0	0	0	0	0	0	0	0	0	14	0	0	0	1	0	0	0	2	0	0	0	19
AT5TE40490	ATDNA12T3_2	DNA	566	0	0	0	0	0	0	1	0	0	0	15	0	0	0	15	0	0	0	1	19	1	1	0	0	0	0	0	0	0	0	0	0	0	8	0	0	0	7	0	0	0	4	0	0	0	3
AT5TE40185	ATHILA0_I	LTR/Gypsy	84	0	1	0	0	0	0	1	0	0	0	14	0	0	0	81	0	0	0	0	1	0	0	0	0	0	1	0	0	0	0	0	0	0	12	0	0	0	2	0	0	0	0	0	0	0	46
AT1TE51475	ATHILA6A	LTR/Gypsy	2512	0	0	0	0	0	0	11	0	0	0	14	0	0	0	77	0	0	0	0	2	1	8	0	0	0	2	0	0	0	1	0	0	0	9	0	0	0	5	0	0	0	7	0	0	0	36
AT3TE59385	ATHILA2	LTR/Gypsy	1556	0	0	0	0	0	0	9	0	0	0	14	0	0	0	53	0	0	0	1	3	0	5	0	0	0	3	0	0	0	1	0	0	0	10	0	0	0	4	0	0	0	1	0	0	0	29
AT1TE44680	ATHILA6B	LTR/Gypsy	1137	0	0	0	0	0	0	4	0	0	0	14	0	0	0	51	0	0	0	0	2	0	4	0	0	0	0	0	0	0	0	0	0	0	13	0	0	0	1	0	0	0	2	0	0	0	28
AT4TE13375	ATHILA0_I	LTR/Gypsy	2244	0	0	0	0	0	0	8	0	0	0	14	0	0	0	45	0	0	0	0	6	1	4	0	0	0	4	0	0	0	0	0	0	0	9	0	0	0	5	0	0	0	2	0	0	0	32
AT1TE51005	ATHILA6B	LTR/Gypsy	1659	0	0	0	0	0	0	6	0	0	0	14	0	0	0	28	0	0	0	0	0	1	4	0	0	0	1	0	0	0	1	0	0	0	12	0	0	0	2	0	0	0	1	0	0	0	18
AT1TE34650	ATLINEIII	LINE/L1	1786	0	0	0	0	0	0	3	0	0	0	14	0	0	0	18	0	0	0	0	7	0	1	0	0	0	1	0	0	0	1	0	0	0	10	0	0	0	4	0	0	0	4	0	0	0	7
AT4TE23780	ATREP10D	RC/Helitron	2618	0	0	0	0	0	0	2	0	0	0	14	0	0	0	15	0	0	0	1	6	1	1	0	0	0	0	0	0	0	1	0	0	0	12	0	0	0	2	0	0	0	9	0	0	0	2
AT5TE44795	ATENSPM6	DNA/En-Spm	1975	0	0	0	0	0	0	21	0	0	0	14	0	0	0	2	0	0	0	1	3	0	14	0	0	0	5	0	0	0	2	0	0	0	8	0	0	0	6	0	0	0	0	0	0	0	2
AT2TE11765	ATHILA2	LTR/Gypsy	1829	0	0	0	0	0	0	11	0	0	0	13	0	0	0	81	0	0	0	0	2	0	8	0	0	0	2	0	0	0	1	0	0	0	10	0	0	0	3	0	0	0	2	0	0	0	45
AT5TE46015	ATHILA3	LTR/Gypsy	3694	0	0	0	0	0	0	8	0	0	0	13	0	0	0	62	0	0	0	2	6	2	5	0	0	0	2	0	0	0	1	0	0	0	6	0	0	0	7	0	0	0	8	0	0	0	35
AT2TE17425	ATHILA2	LTR/Gypsy	1786	0	0	0	0	0	0	11	0	0	0	13	0	0	0	61	0	0	0	0	3	1	6	0	0	0	3	0	0	0	2	0	0	0	9	0	0	0	4	0	0	0	2	0	0	0	34
AT2TE17585	ATHILA0_I	LTR/Gypsy	1802	0	0	0	0	0	0	8	0	0	0	13	0	0	0	56	0	0	0	0	0	1	4	0	0	0	3	0	0	0	1	0	0	0	9	0	0	0	4	0	0	0	3	0	0	0	33
AT2TE17795	ATHILA2	LTR/Gypsy	1796	0	0	0	0	0	0	6	0	0	0	13	0	0	0	54	0	0	0	2	0	0	3	0	0	0	3	0	0	0	0	0	0	0	7	0	0	0	6	0	0	0	2	0	0	0	27
AT3TE56710	ATHILA6A	LTR/Gypsy	4652	0	0	0	0	0	0	7	0	0	0	13	0	0	0	53	0	0	0	0	2	3	6	0	0	0	1	0	0	0	0	0	0	0	10	0	0	0	3	0	0	0	4	0	0	0	26
AT5TE43240	ATHILA2	LTR/Gypsy	4260	0	0	0	0	0	0	21	0	0	0	13	0	0	0	52	0	0	0	0	9	0	15	0	0	0	4	0	0	0	2	0	0	0	10	0	0	0	3	0	0	0	3	0	0	0	33
AT2TE21450	ATHILA2	LTR/Gypsy	3006	0	0	0	0	0	0	9	0	0	0	13	0	0	0	49	0	0	0	0	7	0	8	0	0	0	0	0	0	0	1	0	0	0	12	0	0	0	1	0	0	0	4	0	0	0	25
AT4TE17505	ATHILA	LTR/Gypsy	1418	0	0	0	0	0	0	10	0	0	0	13	0	0	0	44	0	0	0	1	1	1	6	0	0	0	4	0	0	0	0	0	0	0	10	0	0	0	3	0	0	0	2	0	0	0	25
AT3TE91870	ATCOPIA13	LTR/Copia	2848	0	0	0	0	0	0	2	0	0	0	13	0	0	0	16	0	0	0	0	0	1	1	0	0	0	1	0	0	0	0	0	0	0	11	0	0	0	2	0	0	0	3	0	0	0	9
AT4TE52540	Unassigned	Unassigned	1701	0	0	0	NA	0	0	0	0	0	0	13	0	0	0	11	0	0	0	1	1	0	0	0	0	0	0	0	0	0	0	0	0	0	11	0	0	0	2	0	0	0	4	0	0	0	4
AT1TE62585	ATGP1	LTR/Gypsy	1112	0	0	0	0	0	0	19	0	0	0	13	0	0	0	3	0	0	0	0	3	2	10	0	0	0	8	0	0	0	1	0	0	0	11	0	0	0	2	0	0	0	0	0	0	0	0
AT5TE08870	ATCOPIA18	LTR/Copia	2385	0	0	0	0	0	0	16	0	0	0	13	0	0	0	1	0	0	0	0	2	1	11	0	0	0	3	0	0	0	2	0	0	0	11	0	0	0	2	0	0	0	0	0	0	0	0
AT1TE46775	ATHILA6B	LTR/Gypsy	1216	0	0	0	0	0	0	4	0	0	0	12	0	0	0	55	0	0	0	1	3	0	3	0	0	0	1	0	0	0	0	0	0	0	9	0	0	0	3	0	0	0	1	0	0	0	28
AT2TE12040	ATHILA3	LTR/Gypsy	1629	0	0	0	0	0	0	8	0	0	0	12	0	0	0	48	0	0	0	0	1	1	7	0	0	0	0	0	0	0	1	0	0	0	9	0	0	0	3	0	0	0	2	0	0	0	31
AT3TE55410	ATHILA2	LTR/Gypsy	1750	0	0	0	0	0	0	17	0	0	0	12	0	0	0	45	0	0	0	0	0	0	12	0	0	0	5	0	0	0	0	0	0	0	9	0	0	0	3	0	0	0	5	0	0	0	22
AT4TE09795	ATHILA3	LTR/Gypsy	2210	0	0	0	0	0	0	4	0	0	0	12	0	0	0	21	0	0	0	0	4	0	2	0	0	0	1	0	0	0	1	0	0	0	7	0	0	0	5	0	0	0	3	0	0	0	9
AT1TE54990	ENDOVIR1	LTR/Copia	2796	0	0	0	0	0	0	18	0	0	0	12	0	0	0	3	0	0	0	1	4	0	12	0	0	0	5	0	0	0	1	0	0	0	8	0	0	0	4	0	0	0	2	0	0	0	1
AT5TE46485	ATHILA6A	LTR/Gypsy	650	0	0	0	0	0	0	2	0	0	0	11	0	0	0	101	0	0	0	0	0	0	1	0	0	0	1	0	0	0	0	0	0	0	6	0	0	0	5	0	0	0	6	0	0	0	54
AT5TE46255	ATHILA3	LTR/Gypsy	756	0	0	0	0	0	0	7	0	0	0	11	0	0	0	63	0	0	0	0	0	0	5	0	0	0	1	0	0	0	1	0	0	0	7	0	0	0	4	0	0	0	3	0	0	0	39
AT1TE46190	ATHILA2	LTR/Gypsy	1543	0	0	0	0	0	0	8	0	0	0	11	0	0	0	52	0	0	0	0	0	0	7	0	0	0	1	0	0	0	0	0	0	0	8	0	0	0	3	0	0	0	1	0	0	0	32
AT2TE22260	ATHILA2	LTR/Gypsy	1696	0	0	0	0	0	0	8	0	0	0	11	0	0	0	39	0	0	0	1	2	1	4	0	0	0	2	0	0	0	2	0	0	0	9	0	0	0	2	0	0	0	4	0	0	0	21
AT3TE60200	ATHILA3	LTR/Gypsy	3414	0	0	0	0	0	0	18	0	0	0	11	0	0	0	38	0	0	0	0	3	1	12	0	0	0	4	0	0	0	2	0	0	0	10	0	0	0	1	0	0	0	4	0	0	0	21
AT2TE17620	ATHILA0_I	LTR/Gypsy	1273	0	0	0	0	0	0	5	0	0	0	11	0	0	0	25	0	0	0	0	3	0	2	0	0	0	3	0	0	0	0	0	0	0	9	0	0	0	2	0	0	0	3	0	0	0	12
AT3TE50175	ATHILA6B	LTR/Gypsy	120	0	0	0	NA	0	0	0	0	0	0	10	0	0	0	92	0	0	0	0	0	1	0	0	0	0	0	0	0	0	0	0	0	0	7	0	0	0	3	0	0	0	3	0	0	0	49
AT5TE42065	ATHILA2	LTR/Gypsy	1119	0	0	0	0	0	0	9	0	0	0	10	0	0	0	51	0	0	0	0	0	1	5	0	0	0	2	0	0	0	2	0	0	0	5	0	0	0	5	0	0	0	2	0	0	0	28
AT3TE58040	ATHILA2	LTR/Gypsy	461	0	0	0	0	0	0	3	0	0	0	10	0	0	0	47	0	0	0	0	0	0	1	0	0	0	2	0	0	0	0	0	0	0	7	0	0	0	3	0	0	0	3	0	0	0	23
AT1TE46385	ATHILA2	LTR/Gypsy	3365	0	0	0	0	0	0	23	0	0	0	10	0	0	0	39	0	0	0	0	4	0	19	0	0	0	3	0	0	0	1	0	0	0	6	0	0	0	4	0	0	0	2	0	0	0	22
AT4TE17520	ATHILA2	LTR/Gypsy	1132	0	0	0	0	0	0	6	0	0	0	10	0	0	0	33	0	0	0	1	1	0	3	0	0	0	2	0	0	0	1	0	0	0	8	0	0	0	2	0	0	0	2	0	0	0	17
AT4TE15785	ATHILA6A	LTR/Gypsy	990	0	0	0	0	0	0	2	0	0	0	10	0	0	0	28	0	0	0	0	1	0	2	0	0	0	0	0	0	0	0	0	0	0	8	0	0	0	2	0	0	0	0	0	0	0	15
AT5TE72200	TSCL	LINE?	1226	0	0	0	NA	0	0	0	0	0	0	10	0	0	0	11	0	0	0	0	2	0	0	0	0	0	0	0	0	0	0	0	0	0	5	0	0	0	5	0	0	0	4	0	0	0	4
AT1TE46660	VANDAL3	DNA/MuDR	2047	0	0	0	0	0	0	14	0	0	0	10	0	0	0	1	0	0	0	0	7	0	10	0	0	0	2	0	0	0	2	0	0	0	10	0	0	0	0	0	0	0	1	0	0	0	0
AT2TE15435	ATHILA6A	LTR/Gypsy	159	0	0	0	0	0	0	2	0	0	0	9	0	0	0	57	0	0	0	0	0	0	2	0	0	0	0	0	0	0	0	0	0	0	5	0	0	0	4	0	0	0	5	0	0	0	34
AT3TE59095	ATHILA2	LTR/Gypsy	688	0	0	0	0	0	0	2	0	0	0	9	0	0	0	56	0	0	0	0	1	0	2	0	0	0	0	0	0	0	0	0	0	0	8	0	0	0	1	0	0	0	2	0	0	0	32
AT2TE16525	ATHILA0_I	LTR/Gypsy	878	0	0	0	0	0	0	5	0	0	0	9	0	0	0	42	0	0	0	0	1	0	5	0	0	0	0	0	0	0	0	0	0	0	7	0	0	0	2	0	0	0	1	0	0	0	26
AT5TE43435	ATHILA6A	LTR/Gypsy	2181	0	0	0	0	0	0	14	0	0	0	9	0	0	0	37	0	0	0	1	3	1	10	0	0	0	3	0	0	0	1	0	0	0	8	0	0	0	1	0	0	0	3	0	0	0	24
AT3TE58075	ATHILA3	LTR/Gypsy	954	0	0	0	0	0	0	8	0	0	0	9	0	0	0	36	0	0	0	0	1	0	4	0	0	0	4	0	0	0	0	0	0	0	5	0	0	0	4	0	0	0	2	0	0	0	22
AT3TE60430	ATGP10	LTR/Gypsy	477	0	0	0	NA	0	0	0	0	0	0	9	0	0	0	12	0	0	0	0	0	0	0	0	0	0	0	0	0	0	0	0	0	0	3	0	0	0	6	0	0	0	1	0	0	0	7
AT3TE59705	ATHILA2	LTR/Gypsy	448	0	0	0	0	0	0	2	0	0	0	7	0	0	0	61	0	0	0	0	0	0	1	0	0	0	1	0	0	0	0	0	0	0	6	0	0	0	1	0	0	0	3	0	0	0	34
AT4TE14300	ATHILA2	LTR/Gypsy	85	0	0	0	NA	0	0	0	0	0	0	7	0	0	0	58	0	0	0	0	0	0	0	0	0	0	0	0	0	0	0	0	0	0	5	0	0	0	2	0	0	0	4	0	0	0	31
AT4TE16230	ATHILA3	LTR/Gypsy	806	0	0	0	0	0	0	2	0	0	0	7	0	0	0	57	0	0	0	0	1	0	2	0	0	0	0	0	0	0	0	0	0	0	6	0	0	0	1	0	0	0	1	0	0	0	30
AT1TE46305	ATHILA0_I	LTR/Gypsy	3179	0	0	0	0	0	0	11	0	0	0	7	0	0	0	40	0	0	0	0	1	3	9	0	0	0	2	0	0	0	0	0	0	0	6	0	0	0	1	0	0	0	1	0	0	0	24
AT2TE17640	ATHILA6A	LTR/Gypsy	1303	0	0	0	0	0	0	7	0	0	0	7	0	0	0	38	0	0	0	0	1	0	6	0	0	0	1	0	0	0	0	0	0	0	5	0	0	0	2	0	0	0	3	0	0	0	21
AT4TE18635	ATHILA0_I	LTR/Gypsy	1017	0	0	0	NA	0	0	0	0	0	0	7	0	0	0	33	0	0	0	0	0	0	0	0	0	0	0	0	0	0	0	0	0	0	3	0	0	0	4	0	0	0	3	0	0	0	19
AT3TE60515	ATHILA0_I	LTR/Gypsy	115	0	0	0	NA	0	0	0	0	0	0	7	0	0	0	31	0	0	0	0	0	0	0	0	0	0	0	0	0	0	0	0	0	0	4	0	0	0	3	0	0	0	1	0	0	0	17
AT1TE55450	ATREP15	RC/Helitron	1464	0	0	0	0	0	0	1	0	0	0	7	0	0	0	14	0	0	0	0	5	0	0	0	0	0	1	0	0	0	0	0	0	0	6	0	0	0	1	0	0	0	3	0	0	0	9
AT5TE38625	ATHILA6A	LTR/Gypsy	1049	0	0	0	0	0	0	8	0	0	0	6	0	0	0	69	0	0	0	1	0	0	5	0	0	0	1	0	0	0	2	0	0	0	4	0	0	0	2	0	0	0	3	0	0	0	33
AT1TE47760	ATHILA2	LTR/Gypsy	321	0	0	0	0	0	0	1	0	0	0	6	0	0	0	32	0	0	0	0	0	1	1	0	0	0	0	0	0	0	0	0	0	0	6	0	0	0	0	0	0	0	0	0	0	0	22
AT2TE26850	ATHILA7	LTR/Gypsy	317	0	0	0	NA	1	0.3125	0	0	0	0	6	0	0	6	16	0	0	5	0	0	0	0	0	0	0	0	0	0	0	0	0	0	0	3	0	0	1	3	0	0	5	4	0	0	4	7
AT1TE64630	ATREP11	RC/Helitron	926	0	0	0	0	0	0	1	0	0	0	6	0	0	0	14	0	0	0	0	0	0	1	0	0	0	0	0	0	0	0	0	0	0	6	0	0	0	0	0	0	0	3	0	0	0	6
AT4TE14220	ATHILA0_I	LTR/Gypsy	1558	0	0	0	0	0	0	1	0	0	0	5	0	0	0	40	0	0	0	0	1	0	1	0	0	0	0	0	0	0	0	0	0	0	4	0	0	0	1	0	0	0	4	0	0	0	23
AT2TE16465	ATHILA2	LTR/Gypsy	600	0	0	0	0	0	0	2	0	0	0	5	0	0	0	31	0	0	0	0	0	0	1	0	0	0	1	0	0	0	0	0	0	0	3	0	0	0	2	0	0	0	3	0	0	0	14
AT3TE59595	ATHILA2	LTR/Gypsy	445	0	0	0	0	0	0	4	0	0	0	5	0	0	0	24	0	0	0	0	0	0	1	0	0	0	2	0	0	0	1	0	0	0	4	0	0	0	1	0	0	0	0	0	0	0	15
AT4TE14155	ATDNA12T3_2	DNA	64	0	0	0	NA	0	0	0	0	0	0	5	0	0	0	12	0	0	0	0	0	0	0	0	0	0	0	0	0	0	0	0	0	0	2	0	0	0	3	0	0	0	0	0	0	0	8
AT2TE19495	ATHILA3	LTR/Gypsy	902	0	0	0	0	0	0	3	0	0	0	3	0	0	0	27	0	0	0	0	1	0	2	0	0	0	1	0	0	0	0	0	0	0	2	0	0	0	1	0	0	0	4	0	0	0	12
AT4TE13305	ATHILA5	LTR/Gypsy	108	0	0	0	0	NA	0	1	0	0	0	0	0	0	0	31	0	0	0	0	0	0	0	0	0	0	0	0	0	0	1	0	0	0	0	0	0	0	0	0	0	0	0	0	0	0	19
[truncated: 7 more columns]

## Sheet: Structural Variants
library	te_id	te_family	te_superfamily	sv_type	sv_length	sv_read_support
ddm1	AT1TE36035	ATCOPIA51	LTR/Copia	BND	0	3
ddm1	AT1TE41580	ATCOPIA93	LTR/Copia	BND	0	3
ddm1	AT3TE76225	ATCOPIA52	LTR/Copia	DEL	-839	5
ddm1	AT3TE76225	ATCOPIA52	LTR/Copia	DUP	4584	12
ddm1	AT3TE76225	ATCOPIA52	LTR/Copia	DUP	4586	32
ddm1	AT3TE76225	ATCOPIA52	LTR/Copia	INV	1174	17
ddm1	AT3TE76225	ATCOPIA52	LTR/Copia	INV	158	5
ddm1	AT3TE76225	ATCOPIA52	LTR/Copia	INV	1687	3
ddm1	AT3TE76225	ATCOPIA52	LTR/Copia	INV	265	5
ddm1	AT3TE76225	ATCOPIA52	LTR/Copia	INV	3388	4
ddm1	AT3TE76225	ATCOPIA52	LTR/Copia	INV	3621	11
ddm1	AT3TE76225	ATCOPIA52	LTR/Copia	INV	65	3
ddm1rdr6	AT3TE76225	ATCOPIA52	LTR/Copia	DUP	4581	3
ddm1rdr6	AT3TE76225	ATCOPIA52	LTR/Copia	INV	1108	3
